# Supplementary material for: Stability and Infectivity of SARS-CoV-2 and Viral RNA in Water, Commercial Beverages, and Bodily Fluids
Source: Front Microbiol. 2021 May 5;12:667956. doi: 10.3389/fmicb.2021.667956 (PMC8131666; doi:10.3389/fmicb.2021.667956)
Supplement: Supplementary file 1 [file Data_Sheet_1.docx]

Table 1: Stability and infectivity of DENV-1 in different beverages and bodily fluids over a 28-day period

|  | **Virus titer (log10 PFU/mL)** | | | | | |
| --- | --- | --- | --- | --- | --- | --- |
| **Sample** | **Day 0** | **Day 3** | **Day 7** | **Day 14** | **Day 21** | **Day28** |
| Mineral water | ND3 | 3.5±0.3 | ND | ND | 3.7±0.4 | 3.5±0.1 |
| Milk | ND | 5.0±0.1 | 5.1±0.0 | 4.5±0.0 | 4.7±0.4 | 4.9±0.0 |
| Soy Milk | ND | 3.8±0.2 | 3.4±0.3 | ND | ND | ND |
| Apple juice | ND | ND | ND | ND | ND | ND |
| Orange juice | ND | ND | ND | ND | ND | ND |
| Tomato juice | ND | ND | ND | ND | ND | ND |
| Flavored fruit juice | ND | ND | ND | ND | ND | ND |
| Yogurt drink | ND | ND | ND | ND | ND | ND |
| Black coffee | ND | ND | ND | ND | ND | ND |
| Milk-coffee | ND | ND | ND | ND | ND | ND |
| Cocoa | ND | ND | ND | ND | ND | ND |
| Vinegar drink | ND | ND | ND | ND | ND | ND |
| Cola | ND | ND | ND | ND | ND | ND |
| Lemon-lime carbonated drink | ND | ND | ND | ND | ND | ND |
| Green tea | ND | ND | ND | ND | ND | ND |
| Black tea (Oolong tea) | ND | ND | ND | ND | ND | ND |
| Herbal tea (*Artemisia capillaris*) | ND | ND | ND | ND | ND | ND |
| Beer, 5%1 | ND | ND | ND | ND | ND | ND |
| Sparkling sake, 5%1 | ND | ND | ND | ND | ND | ND |
| Carbonated distilled beverage (shochu), 9%1 | ND | ND | ND | ND | ND | ND |
| White wine, 11%1 | ND | ND | ND | ND | ND | ND |
| Japanese wine (sake), 15∙6%1 | ND | ND | ND | ND | ND | ND |
| Sports drink P | ND | ND | ND | ND | ND | ND |
| Amino sports drink | ND | ND | ND | ND | ND | ND |
| Multivitamin drink | ND | ND | ND | ND | ND | ND |
| Energy tonic | ND | ND | ND | ND | ND | ND |
| Saliva2 | ND | ND | ND | ND | ND | ND |
| Urine2 | ND | ND | ND | ND | ND | ND |
| Distilled water | ND | 4.2±0.1 | 2.74 | ND | 3.6±0.5 | 4.5±0.2 |
| PBS | ND | 4.0±0.1 | ND | ND | NT5 | 3.7±0.2 |
| 10% FBS/MEM | ND | 4.5±0.1 | 4.7±0.0 | 4.2±0.0 | 3.1±0.0 | 3.5±0.0 |

Viral titers are expressed as mean ± standard deviation log10 PFU/mL. Viral titers were titrated using Vero cells. All experiments were performed using at least two independent duplicates.

1Indicates alcohol content.

2Pooled saliva and urine was obtained from Innovative Research, Inc. (Novi, MI, USA).

3 ND below detection limit. The detection limit of the assay was 100 PFU/mL.

4 Only one replicate demonstrated plaques.

5 NT indicates not tested

FBS/MEM, 10% fetal bovine serum with minimum essential medium; PBS, phosphate-buffered saline
